# Supplementary material
Source: publisher figshare collection journal article supplement (https://acs.figshare.com/ndownloader/files/3959917)
Supplement: Supplementary file 1 [file 3959917]

## Supporting Information

### pH Dependent Interaction and Resultant Structures of Silica Nanoparticles and Lysozyme Protein

Sugam Kumar<sup>†</sup>, Vinod K. Aswal<sup>†,\*</sup> and P. Callow<sup>‡</sup>

<sup>†</sup>Solid State Physics Division, Bhabha Atomic Research Centre, Mumbai 400 085, India

<sup>‡</sup>Institut Laue Langevin, 6 rue Jules Horowitz, B.P. 156, 38042 Grenoble Cedex 9, France

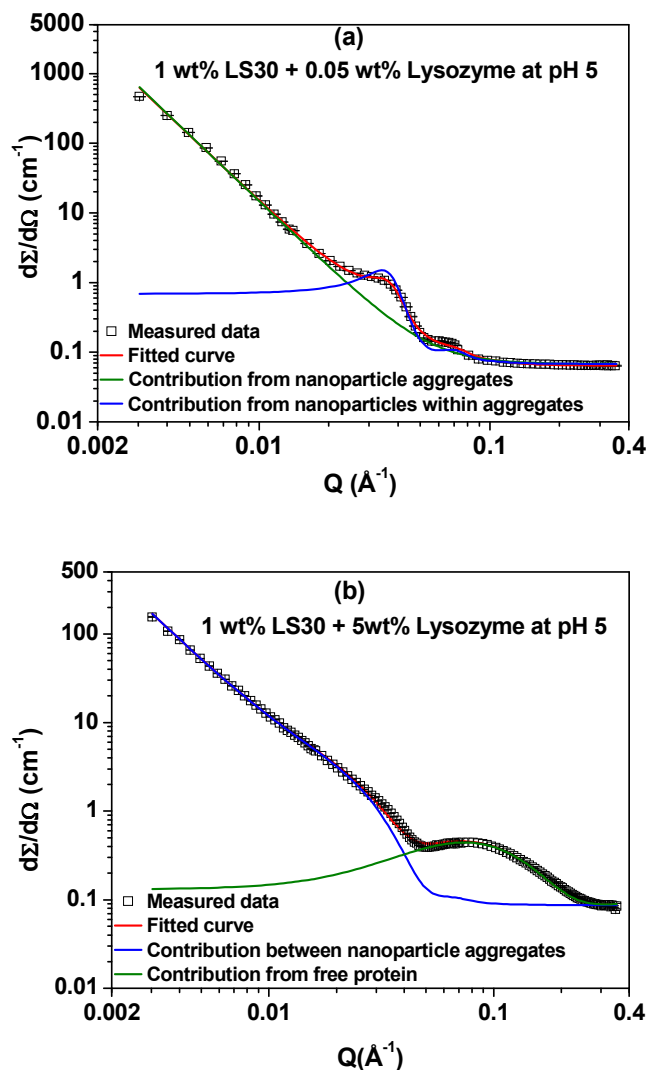

**Figure S1.** The calculated different contributions in the data fitting for (a) 1 wt% nanoparticles with 0.05 wt% protein at pH 5 where the nanoparticle aggregates are characterized by surface fractals (b) 1 wt% nanoparticles with 5wt% protein at pH 5 where the nanoparticle aggregates are characterized by mass fractals coexisting with free protein.

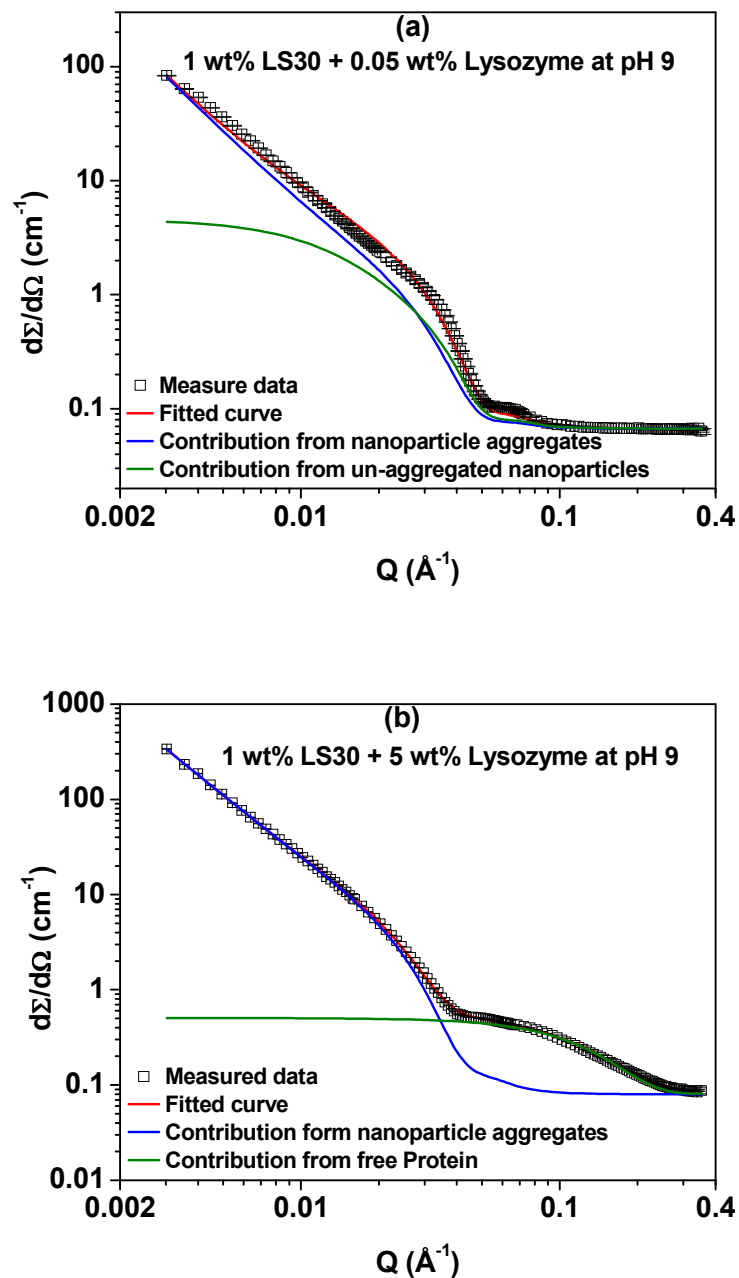

**Figure S2.** The calculated different contributions in the data fitting for (a) 1 wt% nanoparticles with 0.05 wt% protein at pH 9 where the nanoparticle aggregates are characterized by mass fractals coexisting with un-aggregated nanoparticles (b) 1 wt% nanoparticles with 5wt% protein at pH 9 where the nanoparticle aggregates are characterized by mass fractals coexisting with free protein.

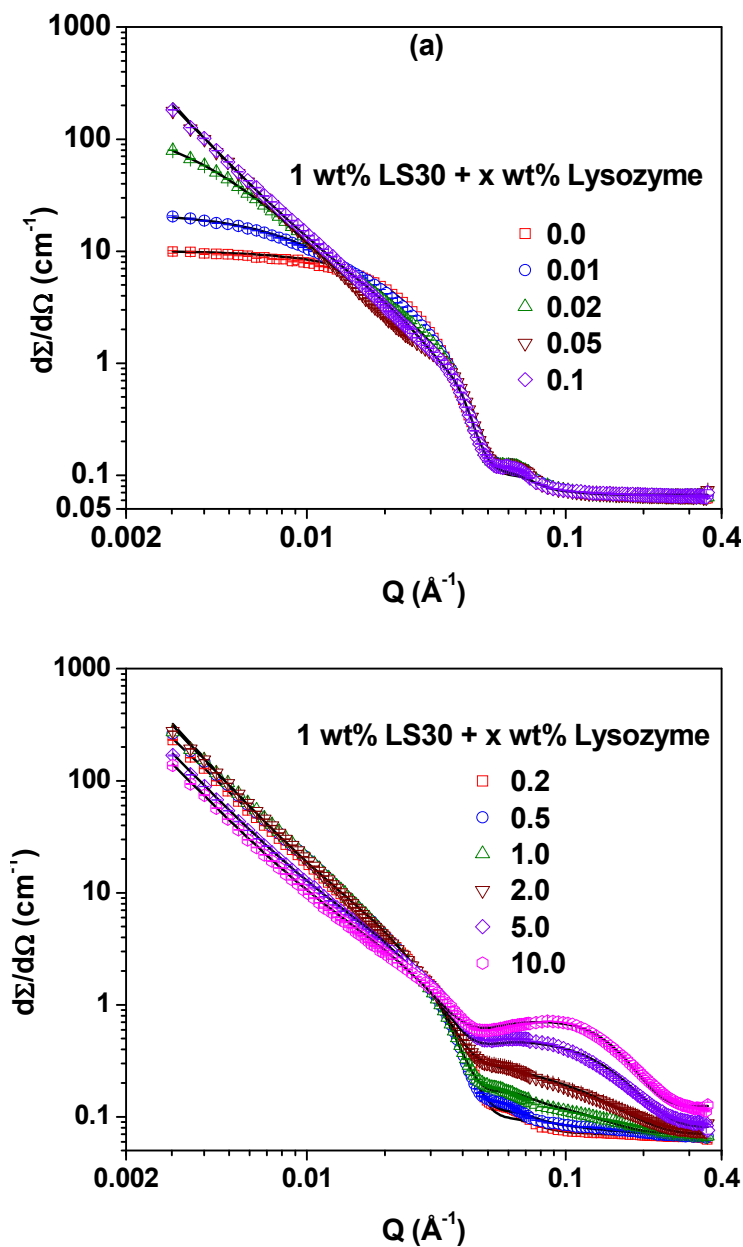

**Figure S3.** SANS data of 1 wt% LS30 silica nanoparticle system with (a) lower protein concentration (0.0 to 0.1 wt%) and (b) higher protein concentration (0.2 to 10 wt%) at pH 7. The data are fitted by combining the scattering contributions from nanoparticle aggregates with un-aggregated nanoparticles for data set (a) and nanoparticle aggregates with free protein for data set (b).

**Table S1.** Fitted parameters of interaction of 1 wt% LS30 silica nanoparticle system with varying lysozyme protein concentration at pH 7.

(a) Low protein concentration regime

| Concentration<br>$C$ (wt%) | Particle radius<br>$R_m$ (nm) | Building block<br>radius<br>$R_b$ (nm) | Fractal<br>dimension<br>$D$ | Fraction of<br>aggregated<br>nanoparticles<br>$\phi_{anp}$ (%) |
|----------------------------|-------------------------------|----------------------------------------|-----------------------------|----------------------------------------------------------------|
| 0.0                        | $8.0 \pm 0.2$                 | -                                      | -                           | 0                                                              |
| 0.01                       | $8.0 \pm 0.2$                 | $9.0 \pm 0.2$                          | $2.5 \pm 0.1$               | 24                                                             |
| 0.02                       | $8.0 \pm 0.2$                 | $9.0 \pm 0.2$                          | $2.5 \pm 0.1$               | 43                                                             |
| 0.05                       | $8.0 \pm 0.2$                 | $9.1 \pm 0.2$                          | $2.4 \pm 0.1$               | 80                                                             |
| 0.1                        | $8.0 \pm 0.2$                 | $9.2 \pm 0.2$                          | $2.5 \pm 0.1$               | 100                                                            |

(b) High protein concentration regime

| Concentration<br>$C$ (wt%) | Particle radius<br>$R_m$ (nm) | Building block<br>radius<br>$R_b$ (nm) | Fractal<br>dimension<br>$D$ | Fraction of free<br>protein<br>$\phi_{fp}$ (%) |
|----------------------------|-------------------------------|----------------------------------------|-----------------------------|------------------------------------------------|
| 0.2                        | $8.0 \pm 0.2$                 | $9.3 \pm 0.2$                          | $2.5 \pm 0.1$               | 24                                             |
| 0.5                        | $8.0 \pm 0.2$                 | $9.2 \pm 0.2$                          | $2.5 \pm 0.1$               | 48                                             |
| 1.0                        | $8.0 \pm 0.2$                 | $9.3 \pm 0.2$                          | $2.4 \pm 0.1$               | 60                                             |
| 2.0                        | $8.0 \pm 0.2$                 | $9.4 \pm 0.2$                          | $2.5 \pm 0.1$               | 69                                             |
| 5.0                        | $8.0 \pm 0.2$                 | $9.3 \pm 0.2$                          | $2.3 \pm 0.1$               | 75                                             |
| 10.0                       | $8.0 \pm 0.2$                 | $9.4 \pm 0.2$                          | $2.4 \pm 0.1$               | 82                                             |

**Table S2.** The aggregate structure and free component present in 1 wt% LS30 silica nanoparticles with varying lysozyme protein concentrations (0.01, 0.1, 1.0 and 10.0 wt%) at three pH values (5, 7 and 9).

| pH value | Protein concentration = 0.01 wt% |                   |                |
|----------|----------------------------------|-------------------|----------------|
|          | Aggregate structure              |                   | Free component |
|          | Fractal morphology               | Fractal dimension |                |
| 5        | Surface                          | $2.7 \pm 0.1$     | Nanoparticles  |
| 7        | Mass                             | $2.5 \pm 0.1$     | Nanoparticles  |
| 9        | Mass                             | $2.1 \pm 0.1$     | Nanoparticles  |

| pH value | Protein concentration = 0.1 wt% |                   |                |
|----------|---------------------------------|-------------------|----------------|
|          | Aggregate structure             |                   | Free component |
|          | Fractal morphology              | Fractal dimension |                |
| 5        | Surface                         | $2.8 \pm 0.1$     | Protein        |
| 7        | Mass                            | $2.5 \pm 0.1$     | -              |
| 9        | Mass                            | $2.1 \pm 0.1$     | Nanoparticles  |

| pH value | Protein concentration = 1.0 wt% |                   |                |
|----------|---------------------------------|-------------------|----------------|
|          | Aggregate structure             |                   | Free component |
|          | Fractal morphology              | Fractal dimension |                |
| 5        | Surface                         | $2.7 \pm 0.1$     | Protein        |
| 7        | Mass                            | $2.4 \pm 0.1$     | Protein        |
| 9        | Mass                            | $2.1 \pm 0.1$     | Protein        |

| pH value | Protein concentration = 10.0 wt% |                   |                |
|----------|----------------------------------|-------------------|----------------|
|          | Aggregate structure              |                   | Free component |
|          | Fractal morphology               | Fractal dimension |                |
| 5        | Mass                             | $2.5 \pm 0.1$     | Protein        |
| 7        | Mass                             | $2.4 \pm 0.1$     | Protein        |
| 9        | Mass                             | $2.1 \pm 0.1$     | Protein        |

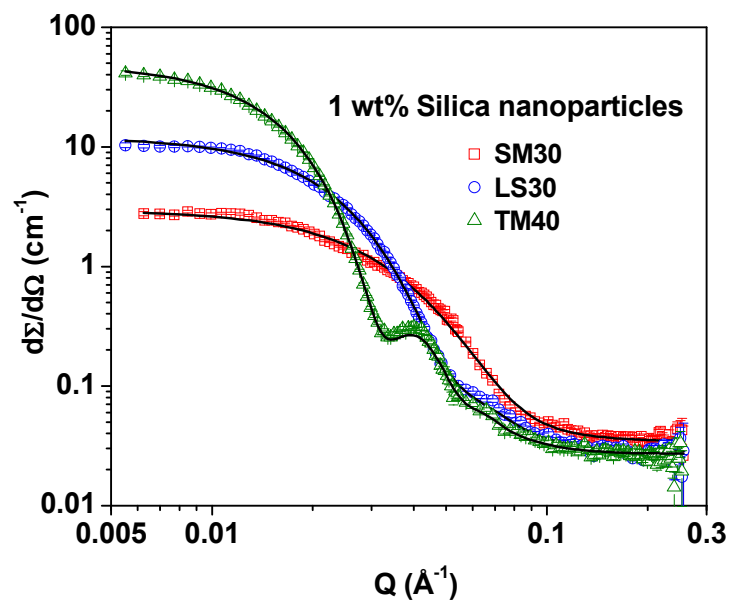

**Figure S4.** SANS data of 1 wt% different sized silica nanoparticle (SM30, LS30 and TM40) systems. All nanoparticle systems are fitted with a form factor of polydispersed spheres.

**Table S3.** Structural parameters of different silica nanoparticle systems.

| Nanoparticle system | Mean radius<br>$R_m(\text{nm})$ | Polydispersity<br>$\sigma$ |
|---------------------|---------------------------------|----------------------------|
| SM30                | $4.2 \pm 0.1$                   | $0.30 \pm 0.05$            |
| LS30                | $8.0 \pm 0.2$                   | $0.20 \pm 0.04$            |
| TM40                | $13.0 \pm 0.5$                  | $0.15 \pm 0.03$            |

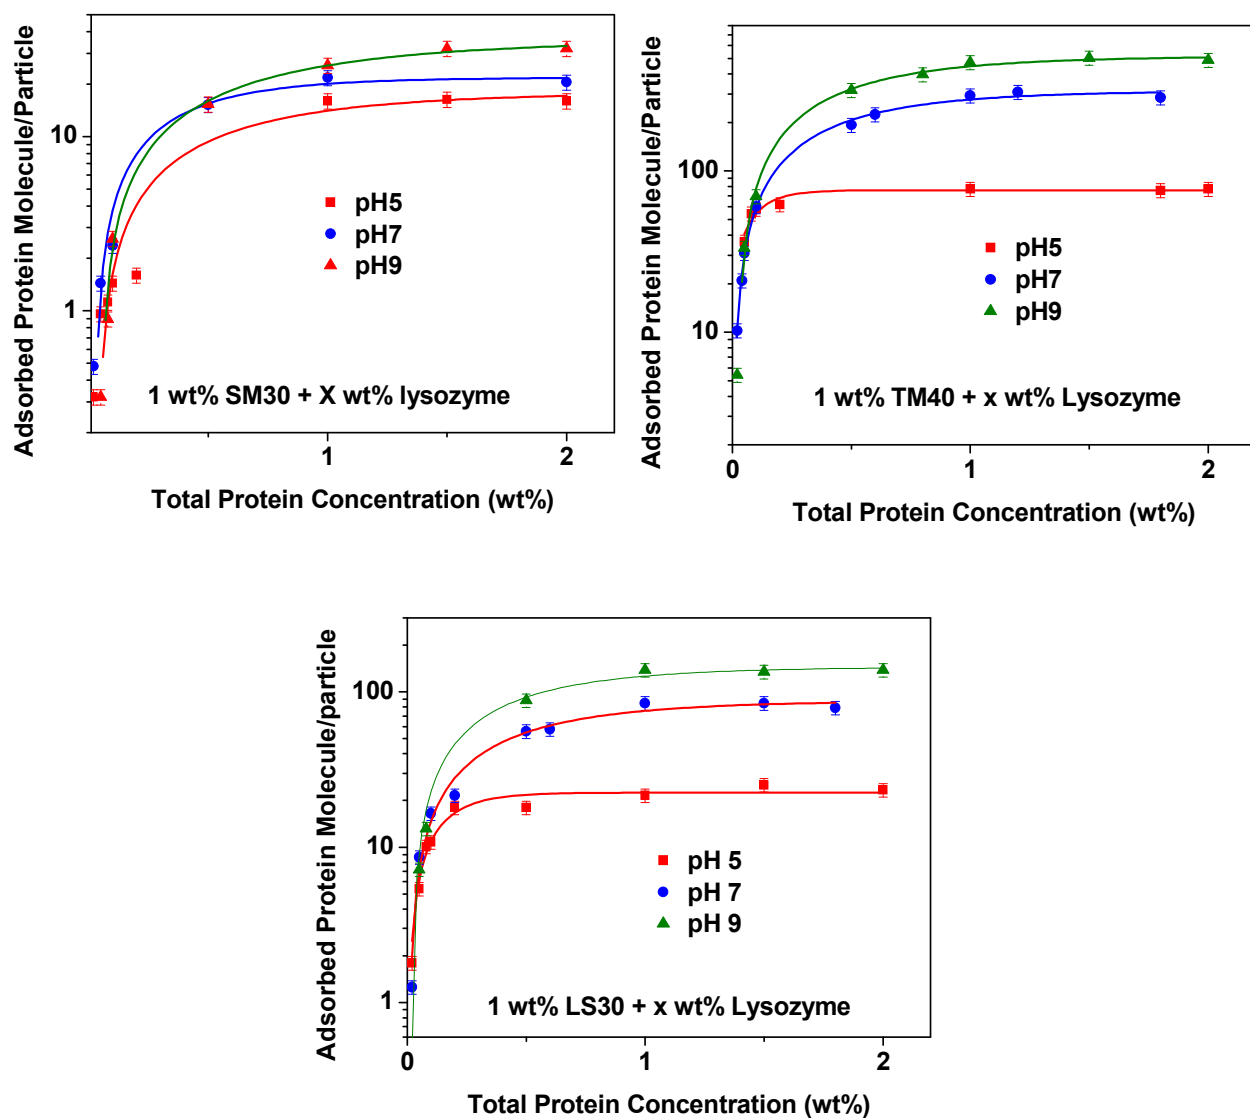

**Figure S5.** Lysozyme protein adsorption curve on 1wt% (a) SM30 (8.4 nm) (b) TM40 (26.0) silica nanoparticles. These curves are expressed as number of adsorbed protein molecules per nanoparticle vs. total protein concentration at three pH values (5, 7 and 9). Solid lines are fits to the curves using an exponential equation.

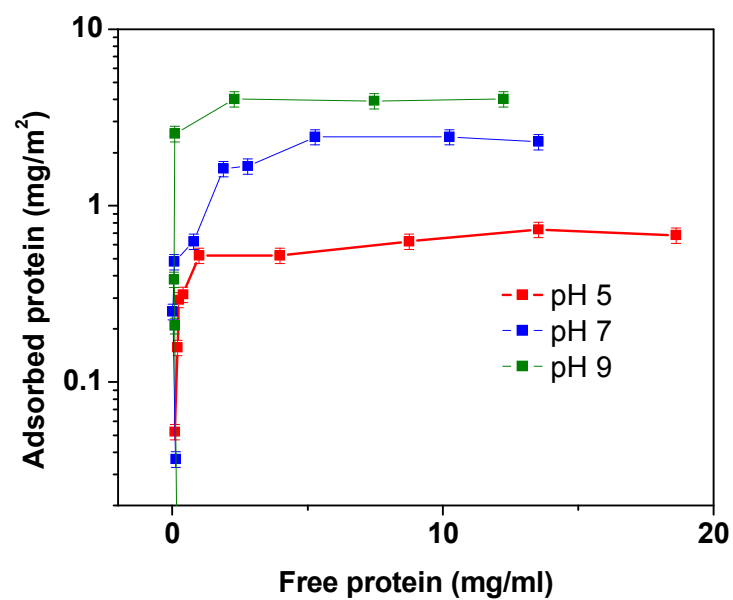

**Figure S6:** Adsorption curve of lysozyme protein on 1wt% silica nanoparticles expressed in terms of adsorbed protein amount ( $\text{mg/m}^2$ ) vs. free protein ( $\text{mg/ml}$ ).



**Table S4.** Fitted structural parameters of complexes of 1 wt% lysozyme protein with 1 wt% different sized silica nanoparticles (SM30, LS30 and TM40) at three pH values (5, 7 and 9).

| Nanoparticle System | Particle radius<br>$R_m$ (nm) | Fractal morphology | Building block radius<br>$R_b$ (nm) | Fractal dimension<br>$D_s/D_m$ | Adsorbed protein molecules/particle | Fraction of free protein<br>$\phi_p$ |
|---------------------|-------------------------------|--------------------|-------------------------------------|--------------------------------|-------------------------------------|--------------------------------------|
| pH 5                |                               |                    |                                     |                                |                                     |                                      |
| SM30                | $4.2 \pm 0.1$                 | Mass               | $5.8 \pm 0.2$                       | $2.3 \pm 0.1$                  | 15                                  | 52                                   |
| LS30                | $8.1 \pm 0.2$                 | Surface            | $9.0 \pm 0.2$                       | $2.7 \pm 0.1$                  | 36                                  | 80                                   |
| TM40                | $13.0 \pm 4.2$                | Surface            | $15.3 \pm 0.5$                      | $2.7 \pm 0.1$                  | 77                                  | 90                                   |
| pH 7                |                               |                    |                                     |                                |                                     |                                      |
| SM30                | $4.2 \pm 0.2$                 | Mass               | $5.7 \pm 0.2$                       | $2.3 \pm 0.1$                  | 20                                  | 35                                   |
| LS30                | $8.0 \pm 0.2$                 | Mass               | $9.2 \pm 0.2$                       | $2.4 \pm 0.1$                  | 76                                  | 58                                   |
| TM40                | $13.0 \pm 0.5$                | Mass               | $150.3 \pm 4.0$                     | $2.4 \pm 0.1$                  | 294                                 | 62                                   |
| pH 9                |                               |                    |                                     |                                |                                     |                                      |
| SM30                | $4.2 \pm 0.1$                 | Mass               | $5.9 \pm 0.2$                       | $2.2 \pm 0.1$                  | 26                                  | 20                                   |
| LS30                | $8.1 \pm 0.2$                 | Mass               | $9.2 \pm 0.2$                       | $2.1 \pm 0.1$                  | 151                                 | 28                                   |
| TM40                | $13.0 \pm 0.5$                | Mass               | $15.0 \pm 0.5$                      | $2.3 \pm 0.1$                  | 464                                 | 40                                   |
